# Supplementary material
Source: publisher site journal article supplement (https://jhr.pensoft.net/article/49622/download/suppl/312/)
Supplement: Supplementary file 1

Image ID	Title	Date	State/Province	County/Region	City/Location	Guide Placement
257972	Another spring bee	5/23/08	PA	Montgomery	Briar Bush Nature Center	Subgenus Andrena cornelli (Azalea Miner)
1342205	Possible Leafcutter Bee (Megachile)	2/25/17	PA	Bucks	Holland	Subgenus Andrena frigida (Frigid Miner)
1366932	Big mandible bee	5/9/17	PA	Centre	Black Moshannon State Park	Subgenus Andrena milwaukeensis (Milwaukee Andrena)
1366933	Flower gripper	5/9/17	PA	Centre	Black Moshannon State Park	Subgenus Andrena milwaukeensis (Milwaukee Andrena)
1367935	Orange hair	5/9/17	PA	Centre	Black Moshannon State Park	Subgenus Andrena milwaukeensis (Milwaukee Andrena)
1367933	Digging in	5/9/17	PA	Centre	Black Moshannon State Park	Subgenus Andrena milwaukeensis (Milwaukee Andrena)
1630982	Miner bee	5/18/18	PA	Lehigh County	Lehigh Gap Nature Center	Subgenus Andrena milwaukeensis (Milwaukee Andrena)
1630986	Miner bee	5/18/18	PA	Lehigh County	Lehigh Gap Nature Center	Subgenus Andrena milwaukeensis (Milwaukee Andrena)
959090	Bee	7/3/14	PA	Allegheny	Allison Park	Subgenus Calliopsis andreniformis (Calliopsis andreniformis)
959089	Bee	7/3/14	PA	Allegheny	Allison Park	Subgenus Calliopsis andreniformis (Calliopsis andreniformis)
959087	Bee	7/3/14	PA	Allegheny	Allison Park	Subgenus Calliopsis andreniformis (Calliopsis andreniformis)
953901	Bee	6/20/14	PA	Allegheny	Allison Park	Subgenus Calliopsis andreniformis (Calliopsis andreniformis)
953902	Bee	6/20/14	PA	Allegheny	Allison Park	Subgenus Calliopsis andreniformis (Calliopsis andreniformis)
953903	Bee	6/20/14	PA	Allegheny	Allison Park	Subgenus Calliopsis andreniformis (Calliopsis andreniformis)
1400904	Perdita?	7/9/17	PA	Sullivan	Ganoga	Subgenus Calliopsis andreniformis (Calliopsis andreniformis)
1009018	Bee	10/9/14	PA	Allegheny	Allison Park	Subgenus Cnemidandrena hirticincta (Hairy-banded Andrena)
1009015	Bee	10/9/14	PA	Allegheny	Allison Park	Subgenus Cnemidandrena hirticincta (Hairy-banded Andrena)
1009016	Bee	10/9/14	PA	Allegheny	Allison Park	Subgenus Cnemidandrena hirticincta (Hairy-banded Andrena)
1009017	Bee	10/9/14	PA	Allegheny	Allison Park	Subgenus Cnemidandrena hirticincta (Hairy-banded Andrena)
1009019	Bee	10/9/14	PA	Allegheny	Allison Park	Subgenus Cnemidandrena hirticincta (Hairy-banded Andrena)
998373	Bee	9/16/14	PA	Allegheny	Allison Park	Subgenus Cnemidandrena hirticincta (Hairy-banded Andrena)
998375	Bee	9/16/14	PA	Allegheny	Allison Park	Subgenus Cnemidandrena hirticincta (Hairy-banded Andrena)
998374	Bee	9/16/14	PA	Allegheny	Allison Park	Subgenus Cnemidandrena hirticincta (Hairy-banded Andrena)
1066324	Hairy-banded Andrena swPA	9/28/14	PA	Fayette	Perryopolis	Subgenus Cnemidandrena hirticincta (Hairy-banded Andrena)
1066322	Hairy-banded Andrena swPA	9/28/14	PA	Fayette	Perryopolis	Subgenus Cnemidandrena hirticincta (Hairy-banded Andrena)
1066326	Hairy-banded Andrena (Andrena hirticincta) swPA	9/28/14	PA	Fayette	Perryopolis	Subgenus Cnemidandrena hirticincta (Hairy-banded Andrena)
1066325	Hairy-banded Andrena swPA	9/28/14	PA	Fayette	Perryopolis	Subgenus Cnemidandrena hirticincta (Hairy-banded Andrena)
1066323	Hairy-banded Andrena swPA	9/28/14	PA	Fayette	Perryopolis	Subgenus Cnemidandrena hirticincta (Hairy-banded Andrena)
1449439	Andrena nubecula	10/2/17	PA	Bucks	Washington Crossing	Subgenus Cnemidandrena nubecula (Cloudy-winged Miner)
1449438	Andrena nubecula	10/2/17	PA	Bucks	Washington Crossing	Subgenus Cnemidandrena nubecula (Cloudy-winged Miner)
1449437	Andrena nubecula	10/2/17	PA	Bucks	Washington Crossing	Subgenus Cnemidandrena nubecula (Cloudy-winged Miner)
1442965	Andrena nubecula?	9/19/17	PA	Bucks	Washington Crossing	Subgenus Cnemidandrena nubecula (Cloudy-winged Miner)
1442968	Andrena nubecula?	9/19/17	PA	Bucks	Washington Crossing	Subgenus Cnemidandrena nubecula (Cloudy-winged Miner)
1442967	Andrena nubecula?	9/19/17	PA	Bucks	Washington Crossing	Subgenus Cnemidandrena nubecula (Cloudy-winged Miner)
1442966	Andrena nubecula?	9/19/17	PA	Bucks	Washington Crossing	Subgenus Cnemidandrena nubecula (Cloudy-winged Miner)
1355085	Andrena cressonii?	4/10/17	PA	Chester	Edgemont	Subgenus Holandrena cressonii cressonii (Andrena cressonii cressonii)
1355084	Andrena cressonii?	4/10/17	PA	Chester	Edgemont	Subgenus Holandrena cressonii cressonii (Andrena cressonii cressonii)
910495	Bee	4/17/14	PA	Allegheny	Allison Park	Subgenus Larandrena miserabilis (Miserable Andrena)
910492	Bee	4/17/14	PA	Allegheny	Allison Park	Subgenus Larandrena miserabilis (Miserable Andrena)
910493	Bee	4/17/14	PA	Allegheny	Allison Park	Subgenus Larandrena miserabilis (Miserable Andrena)
910494	Bee	4/17/14	PA	Allegheny	Allison Park	Subgenus Larandrena miserabilis (Miserable Andrena)
1060687	Miserable Andrena	4/26/15	PA	Bucks	Yardley	Subgenus Larandrena miserabilis (Miserable Andrena)
268218	Andrena sp	4/20/09	PA	Bucks		Subgenus Larandrena miserabilis (Miserable Andrena)
270746	Andrena sp	4/20/09	PA	Bucks		Subgenus Larandrena miserabilis (Miserable Andrena)
175751	Andrena	4/5/08	PA	Delaware	Media	Subgenus Larandrena miserabilis (Miserable Andrena)
273789	Azalea bee?	5/9/09	PA	Montgomery	Temple University, Ambler	Subgenus Larandrena miserabilis (Miserable Andrena)
273788	Azalea bee?	5/9/09	PA	Montgomery	Temple University, Ambler	Subgenus Larandrena miserabilis (Miserable Andrena)
267741	Bee on trout lily	4/18/09	PA	Bucks	Bowman's Hill Wildflower preserve	Subgenus Leucandrena erythronii (Trout-lily Andrena)
267740	Bee on trout lily	4/18/09	PA	Bucks	Bowman's Hill Wildflower preserve	Subgenus Leucandrena erythronii (Trout-lily Andrena)
267739	Bee on trout lily	4/18/09	PA	Bucks	Bowman's Hill Wildflower preserve	Subgenus Leucandrena erythronii (Trout-lily Andrena)
266975	Bee on trout lily	4/18/09	PA	Bucks	Bowman's Hill Wildflower preserve	Subgenus Leucandrena erythronii (Trout-lily Andrena)
354040	Bee on trout lily	4/18/09	PA	Bucks	Bowman's Hill Wildflower preserve	Subgenus Leucandrena erythronii (Trout-lily Andrena)
16801	Xylocopa virginica female?	N/A	PA	Delaware		Subgenus Melandrena carlini (Carlin's Miner)
907462	Pair - Andrena carlini	4/8/14	PA	Lancaster	Millersville	Subgenus Melandrena carlini (Carlin's Miner)
907464	Pair - Carlin's Andrena	4/8/14	PA	Lancaster	Millersville	Subgenus Melandrena carlini (Carlin's Miner)
514947	Andrena?	5/11/11	PA	Montgomery	High School Park. Elkins Park	Subgenus Melandrena carlini (Carlin's Miner)
514948	Andrena?	5/11/11	PA	Montgomery	High School Park. Elkins Park	Subgenus Melandrena carlini (Carlin's Miner)
271023	More spring bees	4/29/09	PA	Montgomery	Willow Grove	Subgenus Melandrena carlini (Carlin's Miner)
271024	More spring bees	4/29/09	PA	Montgomery	Willow Grove	Subgenus Melandrena carlini (Carlin's Miner)
176704	Ground-nesting Bee	4/12/08	PA	Centre	State College	Subgenus Melandrena dunningi (Dunning's Miner)
176703	Ground-nesting Bee	4/12/08	PA	Centre	State College	Subgenus Melandrena dunningi (Dunning's Miner)
889280	Bee	6/4/12	PA	Allegheny	Allison Park	Subgenus Melandrena vicina (Neighborly Miner)
889279	Bee	6/4/12	PA	Allegheny	Allison Park	Subgenus Melandrena vicina (Neighborly Miner)
175193	Colletes? Halictid? Andrenid?	3/22/08	PA	Delaware	Media	Subgenus Melandrena vicina (Neighborly Miner)
893172	Bee	6/13/12	PA	Allegheny	Allison Park	Subgenus Plastandrena crataegi (Hawthorn Andrena)
893171	Bee	6/13/12	PA	Allegheny	Allison Park	Subgenus Plastandrena crataegi (Hawthorn Andrena)
394378	Male?	5/10/10	PA	Montgomery	Pennypack Restoration Trust	Subgenus Plastandrena crataegi (Hawthorn Andrena)
912787	Spring Beauty Andrena	4/22/14	PA	Bucks	Peace Valley Park	Subgenus Ptilandrena erigeniae (Spring Beauty Andrena)
271025	More spring bees 2	4/30/09	PA	Montgomery	Pennypack Restoration Trust	Subgenus Ptilandrena erigeniae (Spring Beauty Andrena)
1687563	Lasioglossum or Halictus or something else?	6/9/19	PA	Bucks	Yardley	Subgenus Scrapteropsis alleghaniensis (Alleghany Andrena)
1687562	Lasioglossum or Halictus or something else?	6/9/19	PA	Bucks	Yardley	Subgenus Scrapteropsis alleghaniensis (Alleghany Andrena)
1687560	Lasioglossum or Halictus or something else?	6/9/19	PA	Bucks	Yardley	Subgenus Scrapteropsis alleghaniensis (Alleghany Andrena)
919323	Adrena ?	5/10/14	PA	Allegheny	Allison Park	Subgenus Simandrena nasonii (Nason's Andrena)
919324	Adrena ?	5/10/14	PA	Allegheny	Allison Park	Subgenus Simandrena nasonii (Nason's Andrena)
919322	Adrena ?	5/10/14	PA	Allegheny	Allison Park	Subgenus Simandrena nasonii (Nason's Andrena)
888869	Bee	5/25/13	PA	Allegheny	Allison Park	Subgenus Simandrena nasonii (Nason's Andrena)
894781	Adrena ?	5/9/12	PA	Allegheny	Allison Park	Subgenus Simandrena nasonii (Nason's Andrena)
894783	Adrena ?	5/9/12	PA	Allegheny	Allison Park	Subgenus Simandrena nasonii (Nason's Andrena)
894782	Adrena ?	5/9/12	PA	Allegheny	Allison Park	Subgenus Simandrena nasonii (Nason's Andrena)
894784	Adrena ?	5/9/12	PA	Allegheny	Allison Park	Subgenus Simandrena nasonii (Nason's Andrena)
888860	Bee	5/9/12	PA	Allegheny	Allison Park	Subgenus Simandrena nasonii (Nason's Andrena)
889286	Bee	5/2/12	PA	Allegheny	Allison Park	Subgenus Simandrena nasonii (Nason's Andrena)
889285	Bee	5/2/12	PA	Allegheny	Allison Park	Subgenus Simandrena nasonii (Nason's Andrena)
511593	On saxifrage flowers	5/1/11	PA	Bucks	Bowman's Hill Wildflower Preserve	Subgenus Simandrena nasonii (Nason's Andrena)
511594	On saxifrage flowers	5/1/11	PA	Bucks	Bowman's Hill Wildflower Preserve	Subgenus Simandrena nasonii (Nason's Andrena)
511596	On saxifrage flowers	5/1/11	PA	Bucks	Bowman's Hill Wildflower Preserve	Subgenus Simandrena nasonii (Nason's Andrena)
511595	On saxifrage flowers	5/1/11	PA	Bucks	Bowman's Hill Wildflower Preserve	Subgenus Simandrena nasonii (Nason's Andrena)
514950	On magnolia blossom	4/22/11	PA	Montgomery	Horsham trail	Subgenus Simandrena nasonii (Nason's Andrena)
514949	On magnolia blossom	4/22/11	PA	Montgomery	Horsham trail	Subgenus Simandrena nasonii (Nason's Andrena)
1377548	Mining Bee?	5/31/17	PA	Bucks	Langhorne - Playwicki Farm Park	Subgenus Taeniandrena wilkella (Andrena wilkella)
373970	Bee IMG_0351	7/5/09	PA	Crawford	Pymatuning Reservoir	Subgenus Taeniandrena wilkella (Andrena wilkella)
373969	Bee IMG_0351	7/5/09	PA	Crawford	Pymatuning Reservoir	Subgenus Taeniandrena wilkella (Andrena wilkella)
646892	A Curious Little Bee	5/23/12	PA	Cumberland	Shippensburg	Subgenus Taeniandrena wilkella (Andrena wilkella)
646895	A Curious Little Bee	5/23/12	PA	Cumberland	Shippensburg	Subgenus Taeniandrena wilkella (Andrena wilkella)
646893	A Curious Little Bee	5/23/12	PA	Cumberland	Shippensburg	Subgenus Taeniandrena wilkella (Andrena wilkella)
937954	Bee	6/14/14	PA	Juniata	Thompsontown	Subgenus Taeniandrena wilkella (Andrena wilkella)
136405	Bee	6/6/06	PA	Montgomery	Churchville Nature Center	Subgenus Taeniandrena wilkella (Andrena wilkella)
504435	On garlic mustard	5/3/05	PA	Montgomery	Pennypack Restoration Trust	Subgenus Taeniandrena wilkella (Andrena wilkella)
504434	On garlic mustard	5/3/05	PA	Montgomery	Pennypack Restoration Trust	Subgenus Taeniandrena wilkella (Andrena wilkella)
1090322	Bee on crown vetch	6/24/15	PA	Philadelphia	Philadelphia	Subgenus Taeniandrena wilkella (Andrena wilkella)
1090323	Bee on crown vetch	6/24/15	PA	Philadelphia	Philadelphia	Subgenus Taeniandrena wilkella (Andrena wilkella)
1400633	What's this bee	7/9/17	PA	Sullivan	Ganoga	Subgenus Taeniandrena wilkella (Andrena wilkella)
536557	Bee	5/11/11	PA	Montgomery	High School Park. Elkins Park	Subgenus Trachandrena nuda (Nude Andrena)
909802	Bee	4/14/14	PA	Allegheny	Allison Park	Subgenus Trachandrena rugosa (Rugose Andrena)
909803	Bee	4/14/14	PA	Allegheny	Allison Park	Subgenus Trachandrena rugosa (Rugose Andrena)
909804	Bee	4/14/14	PA	Allegheny	Allison Park	Subgenus Trachandrena rugosa (Rugose Andrena)
909805	Bee	4/14/14	PA	Allegheny	Allison Park	Subgenus Trachandrena rugosa (Rugose Andrena)
